# Supplementary material for: Gaseous carbon dioxide conversion and calcium carbonate preparation by magnesium phyllosilicate
Source: Royal Society of Chemistry journal article supplement (doi:10.1039/c3ra45798b), 2013-10-29
Supplement: c3ra45798b.pdf [file c3ra45798b.pdf]

## Supporting Information

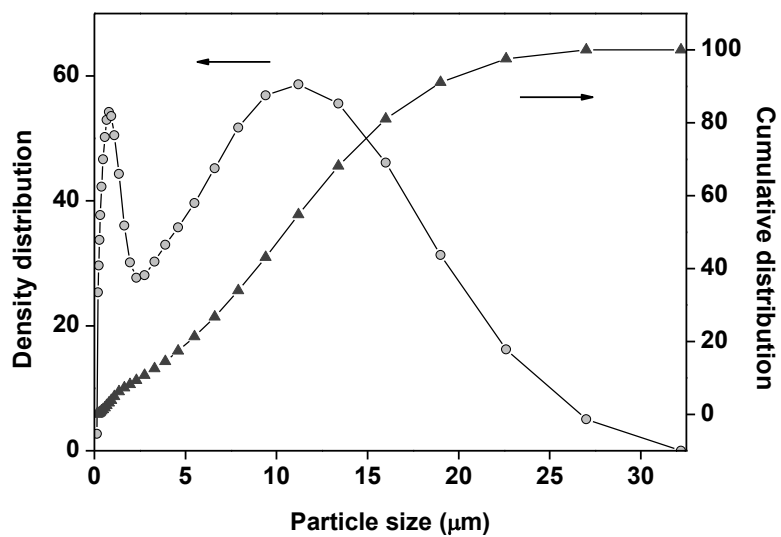

**Figure S1.** DLS analysis of prepared  $\text{CaCO}_3$ . The diameter of  $\text{CaCO}_3$  particles in aqueous solution showed two representative size area.

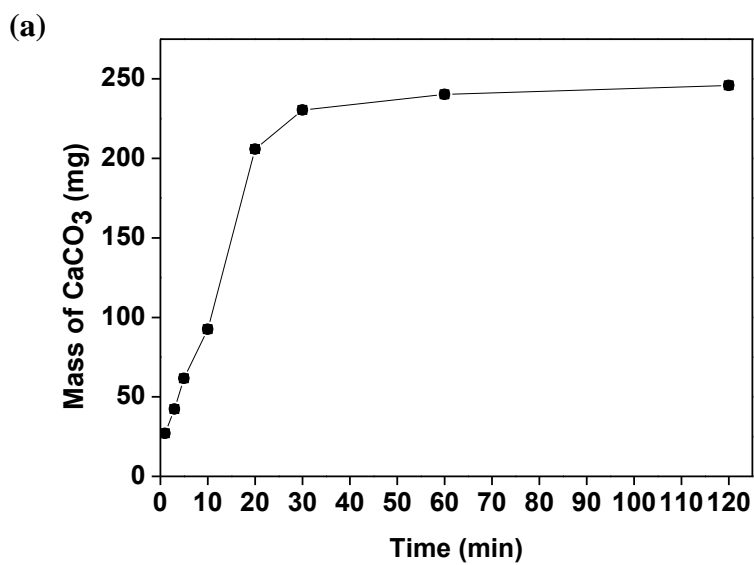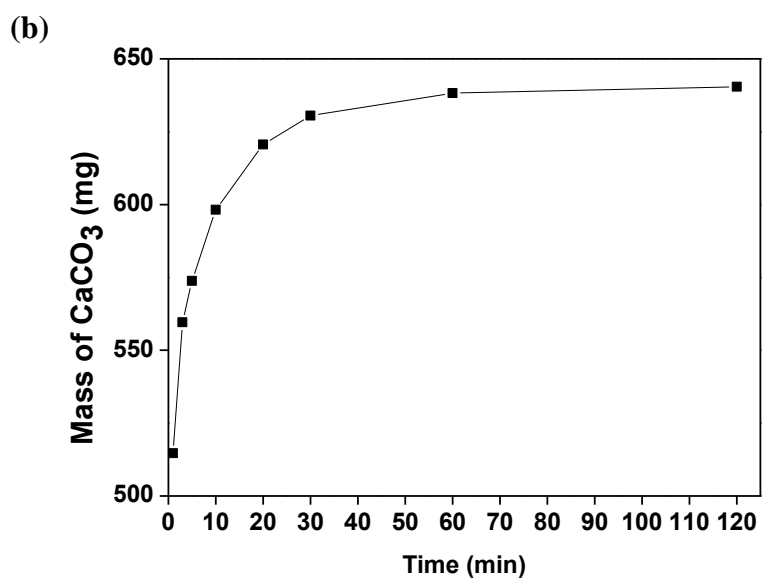

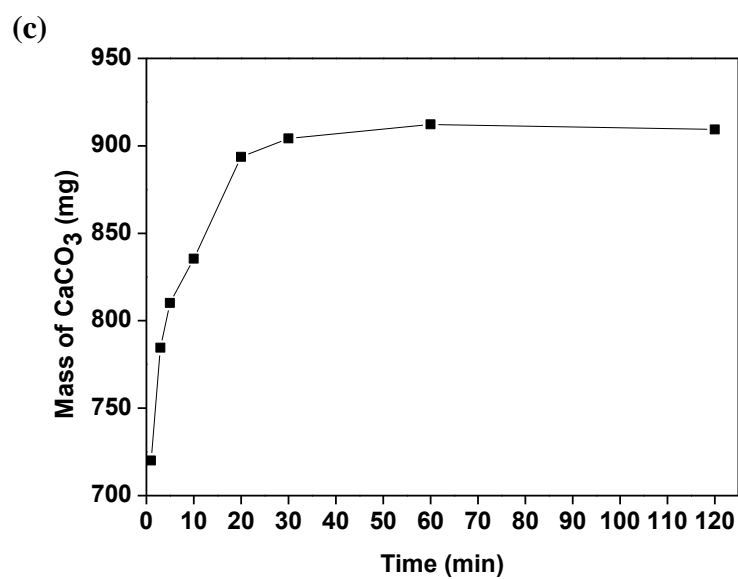

**Figure S2.** The relationship between the amount of CaCO<sub>3</sub> and time of CO<sub>2</sub> supply at different Mg-APTES concentration: (a) 10 mg/ml, (b) 30 mg/ml, and (c) 50 mg/ml.
